# Supplementary material
Source: PubMed Central journal article supplement (PMC5037001)
Supplement: NIHMS802098-supplement-Supp_Info.pdf [file NIHMS802098-supplement-Supp_Info.pdf]

ROLE OF PURINERGIC P2X4 RECEPTORS IN REGULATING STRIATAL DOPAMINE  
HOMEOSTASIS AND DEPENDENT BEHAVIORS

Sheraz Khoja<sup>a</sup>; Vivek Shah<sup>b</sup>; Damaris Garcia<sup>b</sup>; Liana Asatryan<sup>c</sup>; Michael W. Jakowec<sup>b</sup>;  
Daryl L. Davies<sup>c</sup>

<sup>a</sup>Department of Pharmacology and Pharmaceutical Sciences, School of Pharmacy,  
University of Southern California, Los Angeles, CA 90089

<sup>b</sup>Department of Neurology, Keck School of Medicine, University of Southern California,  
Los Angeles, CA 90033

<sup>c</sup>Titus Family Department of Clinical Pharmacy, School of Pharmacy, University of  
Southern California, Los Angeles, CA 90089

Running title: P2X4 receptors modulate dopamine function

Correspondence Address:

Dr. Daryl L. Davies  
Titus Family Department of Clinical Pharmacy  
1985 Zonal Avenue  
Los Angeles, CA 90033  
Phone: (323)-442-1427  
Fax: (323)-442-1704  
Email: [ddavies@usc.edu](mailto:ddavies@usc.edu)

SUPPORTING INFORMATION:

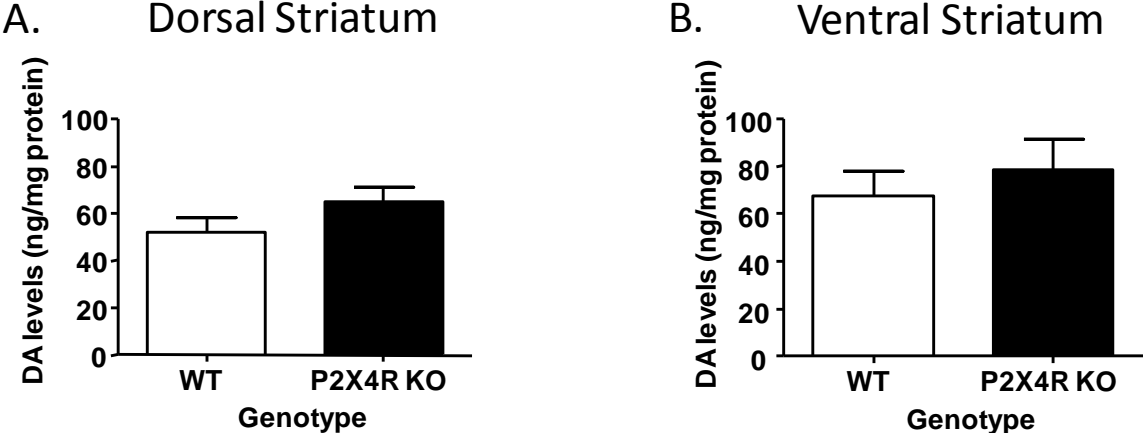

Figure S1: No changes in DA levels in the dorsal (A) and ventral striatum (B) of P2X4R KO mice as compared to WT controls. Values represent mean  $\pm$  SEM for 13 WT, 12 P2X4R KO mice in dorsal striatum and 12 WT, 11 P2X4R KO mice in ventral striatum.

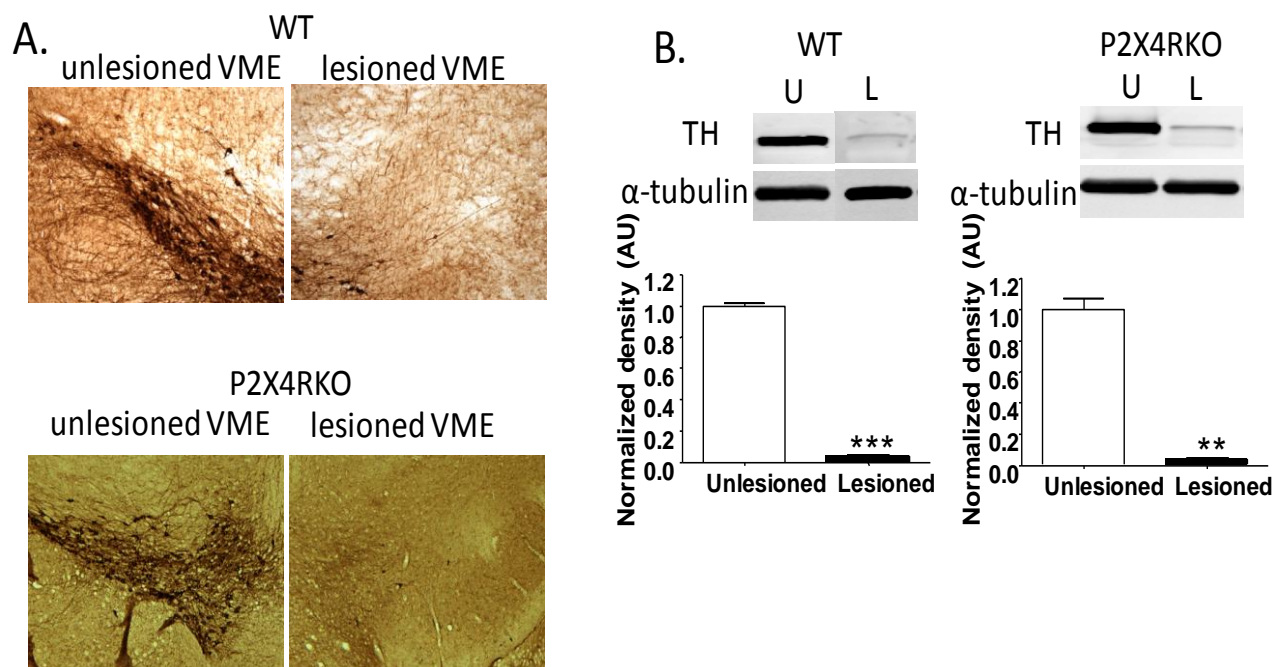

Figure S2: Stereotaxic injection of 6-OHDA (4mg/ml) induced destruction of DA neurons in the ventral mesencephalon (A) and TH density in the striatum (B) of both WT and P2X4R KO to similar extent. U= unlesioned, L=lesioned. Values represent mean  $\pm$  SEM for 4 mice per genotype. \*\* $P < 0.01$ , \*\*\*  $P < 0.001$  versus unlesioned side of striatum, Student t-test

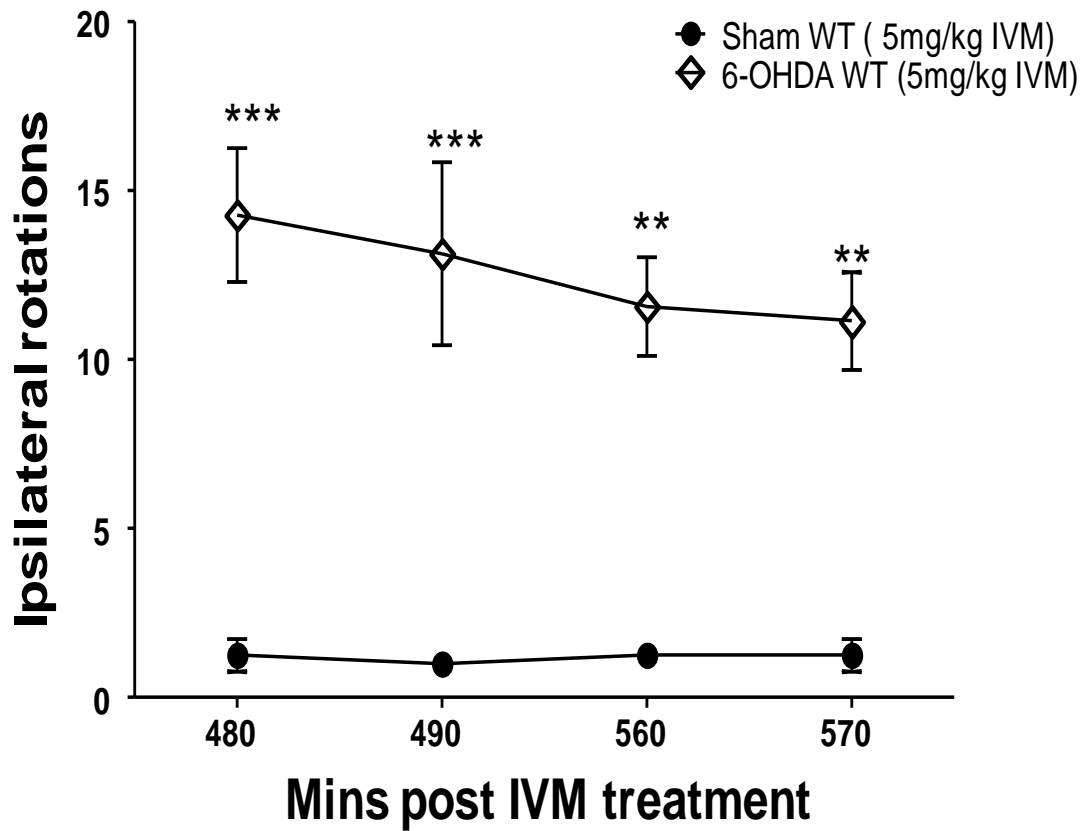

Figure S3: IVM (5mg/kg) induced ipsilateral rotations in 6-OHDA WT mice that were statistically significant from sham WT controls. Values on the y-axis represent mean of number of ipsilateral rotations for a period of 2 hrs post IVM treatment  $\pm$  SEM for 7 6-OHDA WT and 4 sham controls. \*\*  $P < 0.01$ , \*\*\*  $P < 0.001$  versus sham WT controls, Bonferroni post hoc test.
